# Supplementary material for: Preparation of Silk Sericin/Lignin Blend Beads for the Removal of Hexavalent Chromium Ions
Source: MDPI journal article supplement (doi:10.3390/ijms17091466), 2016-09-02
Supplement: s1 [file s1]

# Supplementary Materials: Preparation of Silk Sericin/Lignin Blend Beads for the Removal of Hexavalent Chromium Ions

Hyo Won Kwak, Munju Shin, Haesung Yun and Ki Hoon Lee

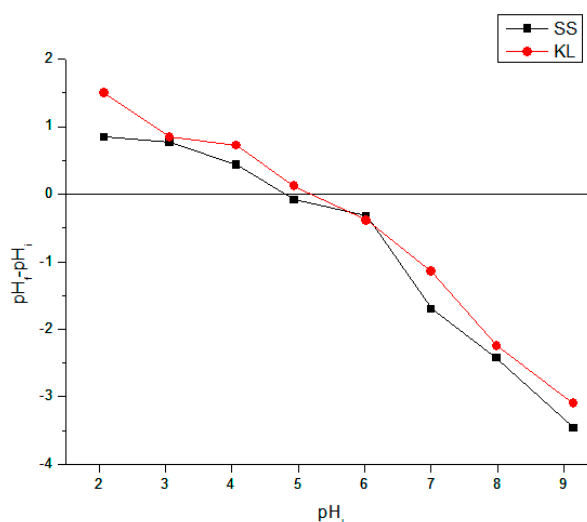

**Figure S1.** Point of zero charge ( $\text{pH}_{\text{pzc}}$ ) of the SS and KL, determined by the pH drift method.

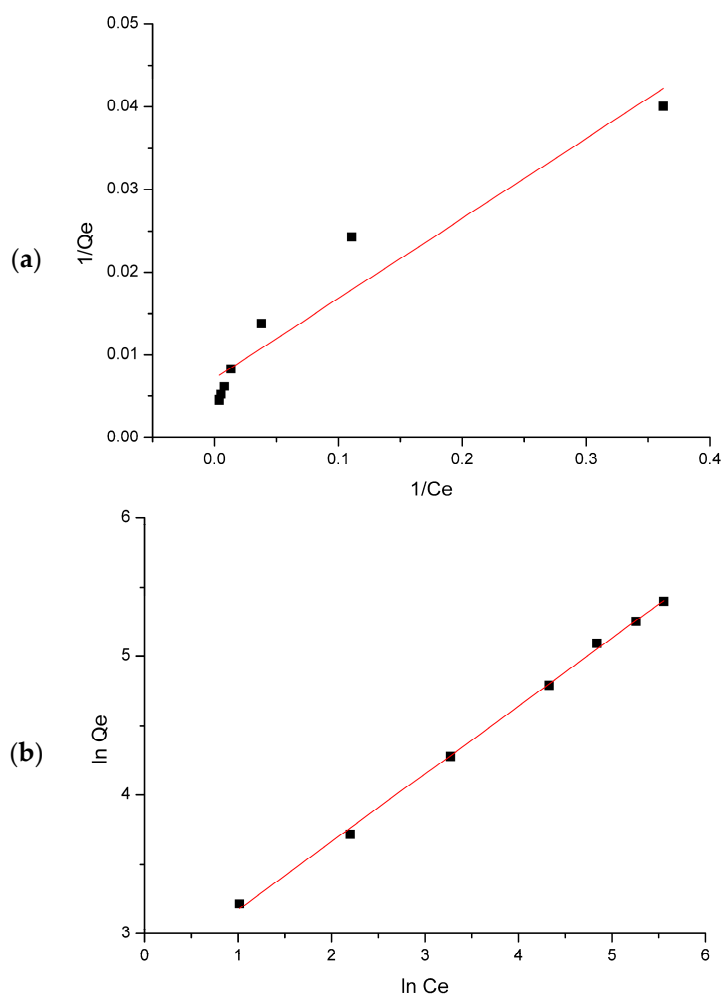

**Figure S2.** Cont.

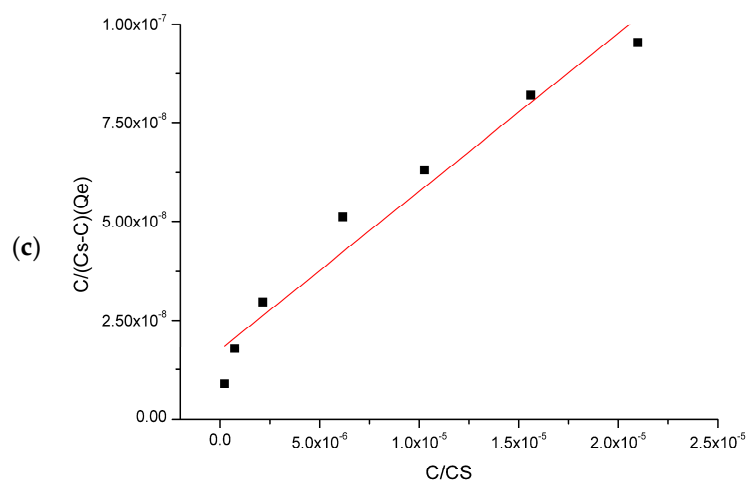

**Figure S2.** Linear plot of (a) Langmuir, (b) Freundlich and (c) BET isotherms of SS/KL beads.

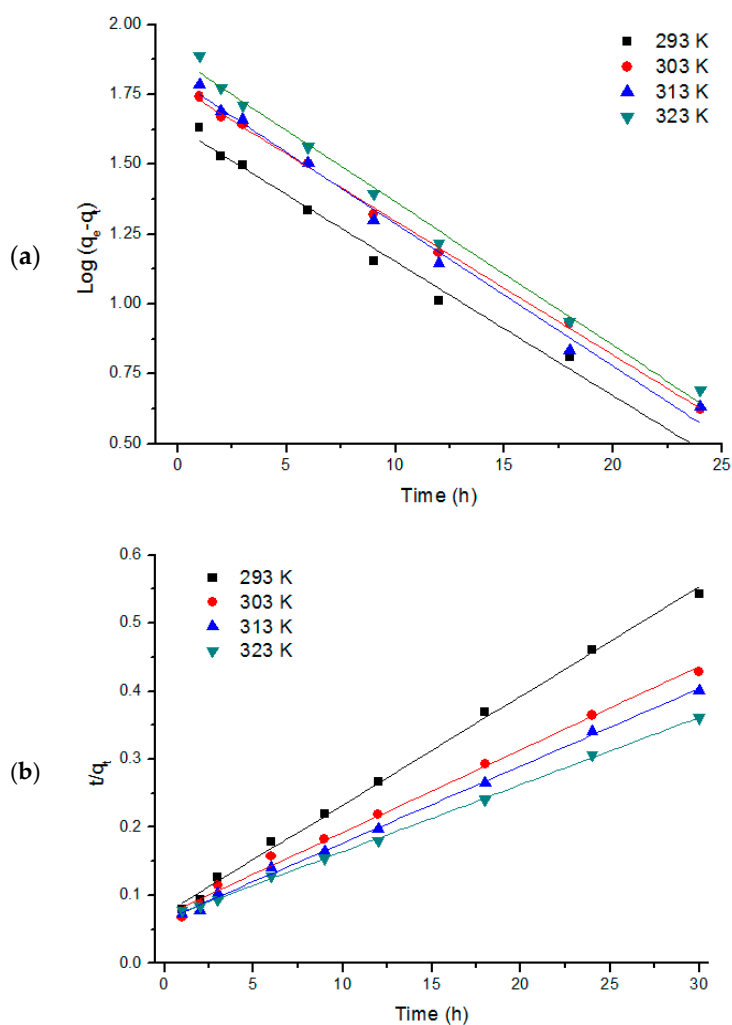

**Figure S3.** Linear plot of (a) the pseudo-first-order and (b) the pseudo-second-order kinetics of SS/KL beads.

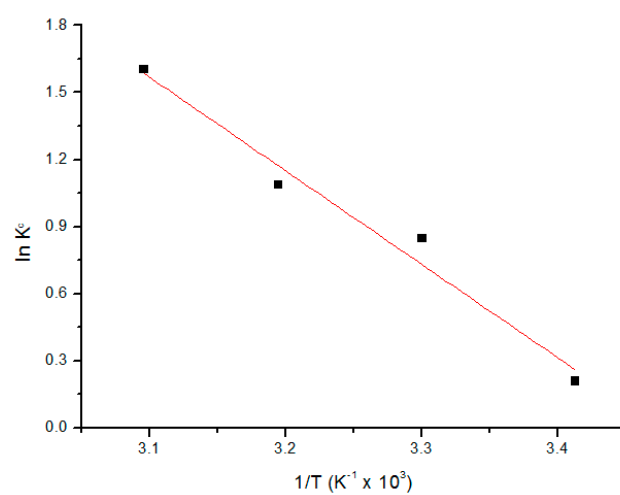

**Figure S4.** Plot of  $\ln K_c$  versus  $1/T$  for the estimation of the thermodynamics of SS/KL beads.
